# Supplementary material
Source: publisher figshare collection journal article supplement (https://sage.figshare.com/ndownloader/files/14555366)
Supplement: Supplementary file 1 [file 14555366]

Other tasks not included in the current study

1. Visual search task (~20 minutes; completed *prior to* Experiment 1 and Experiment 2) – Participants engaged in a visual search task looking at scenes (e.g., a kitchen) and looking for contextual and non-contextual objects.
2. Habituation task (~30 minutes; completed *following* Experiment 1 and Experiment 2) – Participants completed an auditory habituation task while pupillometry data were gathered.
